***C. elegans* LIN-28 controls temporal cell-fate progression by regulating LIN-46 expression via the 5'UTR of *lin-46* mRNA**

Orkan Ilbay<sup>1</sup>, Charles Nelson<sup>1</sup>, Victor Ambros<sup>1,\*</sup>

<sup>1</sup>Program in Molecular Medicine, University of Massachusetts Medical School, 373 Plantation Street, Worcester, MA 01605, USA

\*Correspondence: victor.ambros@umassmed.edu

**ABSTRACT**

LIN-28 is a conserved RNA-binding protein known for its critical roles in the *C. elegans* heterochronic pathway and its capacity to induce proliferation and pluripotency as well as its oncogenic potential in mammals. LIN-28 binds to the precursor of the conserved – cellular differentiation-promoting – microRNA *let-7* and inhibits its maturation. LIN-28 also binds to and regulates many mRNAs in various cell types. However, the determinants and consequences of LIN-28-mRNA interactions are not well understood. Here, we report that LIN-28 in *C. elegans* represses the expression of LIN-46, a downstream protein in the heterochronic pathway, via the (unusually conserved) 5' UTR of the *lin-46* mRNA. We found that both LIN-28 and the 5'UTR of *lin-46* are required to prevent LIN-46 expression at the L1/L2 stages and that precocious LIN-46 expression, caused by mutations in the *lin-46* 5'UTR, is sufficient to skip L2 stage cell-fates, resulting in heterochronic defects similar to the ones observed in *lin-28(lf)* animals. We hypothesize that the *lin-46* 5'UTR mediates LIN-28 binding to the *lin-46* mRNA, which results in the repression of LIN-46 expression. Our results show that precocious LIN-46 expression alone can account for *lin-28(lf)* phenotypes, demonstrating the biological importance of direct (*let-7*-independent) regulation of target mRNAs by LIN-28.

**INTRODUCTION**

Animal development involves complex cell lineages within which different cell-fates are executed in specific orders and at a pace that is in synchrony with overall developmental rate. Expressing symmetric cell-fates that allow cell proliferation or asymmetric cell-fates that enable both self-renewal and the generation of new cell types, a single totipotent cell (embryo) and its progeny generate the populations of specified cells that form the diverse tissues and organs of the animal body. Gene regulatory networks control the levels and spatiotemporal expression patterns of developmental genes so that proper cell-fates are acquired at the right time and place during development.

*C. elegans* develops through four larval stages (L1-L4). Each larval stage is comprised of an invariant set of cell division and cell fate specification events [1]. The order of cell-fates and the timing of cell-fate transitions within individual cell lineages are regulated by genes in the heterochronic pathway [2,3]. In this pathway, three major temporal regulatory transcription factors control the transitions from earlier to later cell fates. These transcription factors are directly or indirectly regulated by microRNAs and/or RNA binding proteins, which facilitate proper cell-fate transitions by controlling the developmentally dynamic expression of the heterochronic pathway transcription factors.

One of the transcription factors in the heterochronic pathway, Hunchback-like-1 (HBL-1), promotes L2-stage symmetric cell divisions and prevents progression to L3-stage asymmetric cell divisions [4,5]. HBL-1 is expressed at the L1&L2 stages and it is downregulated during the L2-to-L3 transition [4,6]. Proper temporal regulation of HBL-1 activity is characterized by specification of L2 cell-fates at the L2 stage and progression to L3 cell-fates concomitant with the L2-to-L3 stage progression. Mutations that cause reduced HBL-1 activity at the L1/L2 stages result in skipping of L2 cell-fates, whereas mutations that

cause ectopic HBL-1 activity at the L3/L4 stages lead to reiterations of L2 cell-fates at these later stages. HBL-1 is regulated, during the L2-to-L3 transition, by *let-7*-family microRNAs (*mir-48/84/241*) [7] and in parallel by *lin-28* [7,8], which acts on *hbl-1* indirectly, via a protein coding gene *lin-46 oi2*+ [9].

LIN-28 is a conserved RNA-binding protein discovered as a heterochronic gene product in *C. elegans* [2]. In *C. elegans* larvae lacking *lin-28* activity, hypodermal stem cells skip L2-stage specific symmetric cell divisions, and precociously transition to later stage cell-fates, which eventually leads to terminal differentiation of the hypodermis while the rest of the larval tissues are still developing [2]. LIN-28 inhibits the maturation of the conserved microRNA *let-7* [10], which, in *C. elegans*, is required for the terminal differentiation of hypodermal tissues at the end of the last larval stage [11]. Curiously, although *let-7* is expressed precociously at the early stages in *lin-28(lf)* larvae and *let-7* function is required for the precocious terminal differentiation of hypodermal cells in *lin-28(lf)* animals, *let-7* function is not required for the skipping of L2 stage cell fates [8]. Instead, loss of a protein coding gene, *lin-46*, suppresses both early and late stage *lin-28(lf)* phenotypes [9], without repressing precocious *let-7* expression [8]. This suggests that LIN-46 might be mis-regulated in *lin-28(lf)* animals, which could potentially be responsible for *lin-28(lf)* phenotypes. It has been shown that LIN-28 binds to the *lin-46* mRNA [12], but the consequence of LIN-28 binding to the *lin-46* mRNA or how (and if) LIN-28 regulates *lin-46* is not known. Additionally, *lin-46* encodes a protein related to bacterial molybdenum cofactor biosynthesis enzyme, and mammalian Gephyrin [13,14] and, although molecular functions of LIN-46 is not clear, our recent findings suggest that LIN-46 affects temporal cell-fates by inhibiting the nuclear accumulation of the transcription factor HBL-1 [manuscript-oi2]. Therefore, it is possible that LIN-28 could promote L2 fates by restricting the expression of LIN-46, and hence maintaining nuclear activity of the L2-fate factor HBL-1.

*C. elegans* LIN-28 and its homologs in mammals (Lin28) have conserved functions: LIN-28/Lin28 inhibits *let-7* expression [10,15–17], binds to and regulates many mRNAs [12,18–20], and promotes proliferation and pluripotency [21–23]. Similar to *C. elegans* development, during mammalian embryogenesis LIN-28 is expressed at early or pluripotent stages and it is downregulated at later or more differentiated stages [21,24,25]. LIN-28 down-regulation in differentiating tissues allows *let-7* microRNA to accumulate; and *let-7* further promotes differentiation by repressing pluripotency and self-renewal promoting genes [26], including *lin-28*. Lastly, LIN-28 expression is associated with many types of cancers and poor prognosis [27,28], and conversely, *let-7* is known to act as a tumor suppressor by repressing oncogenes [29–32].

While certain phenotypes observed in Lin28-deficient mammalian cells can be attributed to increased *let-7* expression and consequent repression of *let-7* targets [17,33], there are *let-7* independent functions of Lin28 [8,34,35], some of which could be explained by mis-regulation of specific mRNA targets of Lin28 [36–39]. Lin28 can regulate the translation of target mRNAs either positively [20] or negatively [18], perhaps in a cell-type specific manner. LIN-28 seems to have a tendency to bind to multiple sites on its mRNA targets, for example, Cho *et al.* found 38.5 sites per mRNA [18]. Therefore, testing the consequences of loss of LIN-28-mediated regulation of specific mRNAs, which would require mutating all potential LIN-28 binding sites on an mRNA, seems challenging. Moreover, although the LIN-28-bound mRNA regions are enriched for certain motifs (e.g. GGAG), these sequence motifs are neither required nor sufficient for LIN-28 binding to its targets [18,20]. In brief, the rules and consequences of LIN-28/*lin-28* binding to mRNAs are not well understood.

Here we show that the critical target of LIN-28 in *C. elegans*, LIN-46, is expressed only at the L3&L4 stages in a temporal profile that is the inverse of LIN-28, which is expressed at the L1&L2 stages. We find that LIN-46 is expressed precociously at the L1&L2 stages in *lin-28(lf)* animals, supporting the idea that LIN-28 represses LIN-46 expression at these early larval stages. We also find that, similar to *lin-28(lf)*, mutations in the 5'UTR of *lin-46* result in precocious LIN-46 expression in the hypodermal seam cells, and that this ectopic LIN-46 expression at the L1/L2 stages is sufficient to result in skipping of L2 stage symmetric seam cell divisions, and precocious expression of L3-adult fates. Endogenously tagged LIN-46 is also expressed in the vulval precursor cells (VPCs) and LIN-46 is precociously expressed in the

VPCs both in *lin-28(lf)* and *lin-46* 5'UTR mutants. Ectopic LIN-46 expression in the VPCs in *lin-46* 5'UTR mutants is sufficient to accelerate cell-fate transitions in these cells, which results in protruding vulva phenotypes similar to *lin-28(lf)* animals. Due to the phenotypic similarity between *lin-28(lf)* and *lin-46* 5'UTR mutants, we hypothesize that the *lin-46* 5'UTR mediates LIN-28 binding to the *lin-46* mRNA, which results in the repression of LIN-46 expression from the *lin-46* mRNA. Our results demonstrate that precocious LIN-46 expression alone, which is observed in *lin-28(lf)* animals and is sufficient to suppress L2 cell-fates and to induce precocious transition to L3 cell-fates, can account for majority of the *lin-28(lf)* phenotypes.

## RESULTS

### *lin-28* represses LIN-46 expression at the early larval stages

The developmental expression patterns of *lin-28* and *lin-46* were previously identified using transcriptional reporters (transgenes expressing a fluorescent protein driven by the promoter of interest) and translational reporters (transgenes expressing the open reading frame of a gene of interest fused with a fluorescent protein driven by the promoter of the gene) [9,21]. The expression of such transgenes does not necessarily accurately represent the expression levels or spatiotemporal patterns of genes expressed from their endogenous loci. To more accurately determine the expression patterns of LIN-28 and LIN-46, we used CRISPR/Cas9 genome editing to tag *lin-28* and *lin-46* with fluorescent proteins at their endogenous loci (Figure 1A). Both of the endogenously tagged loci were determined to be fully functional. We found that endogenously tagged LIN-28::GFP expression is comparable to previous reports [21]: LIN-28 is highly expressed in the embryos and at the L1 and L2 stage larvae and it is diminished at the L3 and later stages (Figure 1B&C). However, the expression pattern of endogenously tagged LIN-46::mCherry differs from the pattern observed using transcriptional and translational reporters [9]: LIN-46::mCherry was not detected at all stages, but only at the L3&L4 stages, and most prominently in hypodermal seam cells (Figure 1C) and in the ventral hypodermal vulval precursor cells (See Table S1 for a detailed comparison). Based on the previous report that the *lin-46* transcriptional reporter transgene is expressed at all larval stages [9], our finding that LIN-46::mCherry expression is restricted to the L3&L4 stages suggests that *lin-46* is post-transcriptional regulated, perhaps on the level of mRNA translation.

The expression pattern of endogenously tagged LIN-46 reveals that LIN-28 and LIN-46 are expressed in a temporally mutually exclusive manner: LIN-28 is expressed early (L1&L2 stages) and LIN-46 is expressed late (L3&L4 stages). This mutually exclusive expression pattern suggested that LIN-28 could potentially repress LIN-46 expression during the L1 and L2 larval stages. To test this, we examined the effect of loss of *lin-28* on the expression pattern of LIN-46. We indeed found that LIN-46 is expressed precociously at the L1 and L2 stages in *lin-28(lf)* animals (Figure 1B&C), consistent with the conclusion that LIN-28 represses LIN-46 expression at these early larval stages.

### Mutations in the *lin-46* 5'UTR result in *lin-28(lf)*-like phenotypes and precocious LIN-46 expression

The finding that LIN-46 is expressed precociously at the L1 and L2 stages in *lin-28(lf)* animals suggests two non-mutually exclusive hypotheses; 1) that LIN-28 might directly repress LIN-46 expression, and 2) that precocious LIN-46 expression could contribute to the precocious developmental phenotypes of *lin-28(lf)*. The latter hypothesis is supported by previous findings that *lin-46(lf)* suppresses the precocious development of *lin-28(lf)* [9]. However, although *lin-46* activity was shown to be *necessary* for the precocious phenotypes of *lin-28(lf)*, it was not known if (precocious) LIN-46 expression could be *sufficient* for precocious development. The possibility that LIN-28 could directly repress LIN-46 expression by binding to the *lin-46* mRNA is supported by CLIP experiments [12].

We sought to test the above two hypotheses by mutation of putative LIN-28-interacting sequences in the *lin-46* mRNA sequence and assaying for precocious developmental phenotypes. Although the published CLIP tags map to both 5' and 3' UTRs and all five exons of the *lin-46* transcript [12], nevertheless, we noticed that the *lin-46* 5'UTR exhibits unusually high sequence conservation among

nematodes (Figure S1A) and contains a GGAG motif that is often associated with LIN-28 binding (Figure S1A&B). Therefore, we targeted the *lin-46* 5'UTR using a CRISPR guide (gRSU, Figure S1A&B), and observed frequent *lin-28(lf)*-like phenotypes in the F1/F2 progeny of the injected P0 animals (Figure S1C). We genotyped several of these F1/F2 progeny, and found a range of *lin-46* 5'UTR deletions varying in size (2-19 bp) in animals expressing *lin-28(lf)*-like phenotypes (Figure S1D).

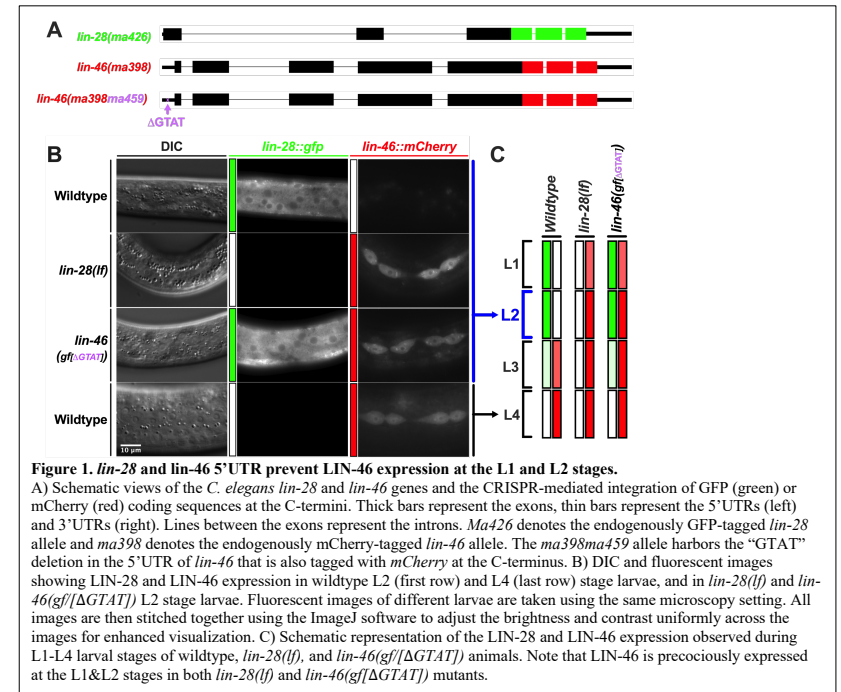

To determine the effects of the *lin-46* 5'UTR mutations on the expression of LIN-46 we injected the CRISPR mix containing the gR\_5U guide into animals carrying the *lin-28::gfp [lin-28(ma426)]* and *lin-46::mCherry [lin-46(ma398)]* alleles (Figure 1A), and generated *lin-46* 5' UTR deletion mutations, which resulted in precocious LIN-46 expression at the L1 and L2 stages (Figure 1A-C). This result shows that (an intact) *lin-46* 5'UTR is required to prevent precocious LIN-46 expression. Importantly, our CRISPR mutagenesis of the *lin-46* 5' UTR did not affect the expression of LIN-28 (Figure 1B&C); thus LIN-46 is expressed precociously in *lin-46* 5'UTR mutants despite the presence of LIN-28, indicating that the *lin-46* 5'UTR likely mediates LIN-28 binding to, and hence the repression of, the *lin-46* mRNA.

It is noteworthy that the inhibition of LIN-46 expression by LIN-28 seems to be independent of, and in parallel to the previously-described *lin-28*-mediated inhibition of *let-7* biogenesis, apparently by binding of LIN-28 to the *let-7* primary transcript [10]. *lin-46(lf)* does not suppress the precocious expression of *let-7* in *lin-28(lf)* animals, indicating that LIN-46 is not responsible for precocious *let-7* biogenesis.

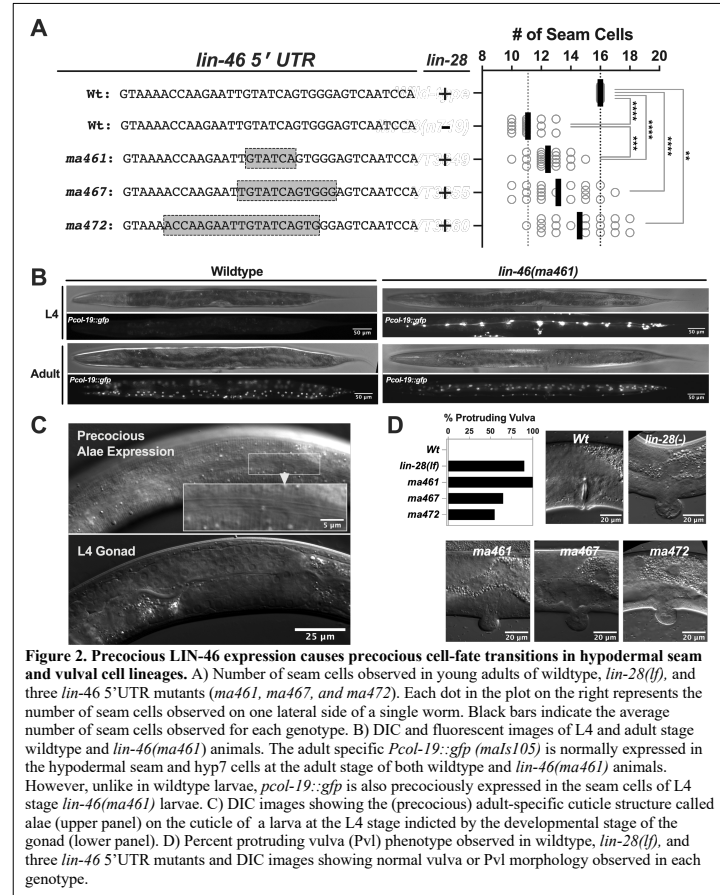

**Figure 2. Precocious LIN-46 expression causes precocious cell-fate transitions in hypodermal seam and vulval cell lineages.** A) Number of seam cells observed in young adults of wildtype, *lin-28(lf)*, and three *lin-46* 5'UTR mutants (*ma461*, *ma467*, and *ma472*). Each dot in the plot on the right represents the number of seam cells observed on one lateral side of a single worm. Black bars indicate the average number of seam cells observed for each genotype. B) DIC and fluorescent images of L4 and adult stage wildtype and *lin-46(ma461)* animals. The adult specific *Pcol-19::gfp* (*mal5105*) is normally expressed in the hypodermal seam and hyp7 cells at the adult stage of both wildtype and *lin-46(ma461)* animals. However, unlike in wildtype larvae, *pcol-19::gfp* is also precociously expressed in the seam cells of L4 stage *lin-46(ma461)* larvae. C) DIC images showing the (precocious) adult-specific cuticle structure called alae (upper panel) on the cuticle of a larva at the L4 stage indicated by the developmental stage of the gonad (lower panel). D) Percent protruding vulva (Pvl) phenotype observed in wildtype, *lin-28(lf)*, and three *lin-46* 5'UTR mutants and DIC images showing normal vulva or Pvl morphology observed in each genotype.

### Precocious LIN-46 expression causes precocious cell-fate transitions in hypodermal seam and vulval cell lineages

To compare in detail the phenotypes of *lin-46* 5'UTR mutants to those of *lin-28(lf)* mutants we assessed the number of seam cells, the timing of adult specific *Pcol-19::gfp* expression and the timing of adult alae formation, and protruding vulva morphology (Pvl) (Figure 2). We examined animals homozygous for three different 5'UTR mutations, *ma461*, *ma467*, and *ma472*, that are deleted for 6, 12, and 19 nucleotides, respectively (Figure 2A).

All three *lin-46* 5'UTR mutants displayed an average of fewer than sixteen seam cells (Figure 2A), which indicates that *lin-46* 5'UTR mutations, presumably as a consequence of consequent precocious LIN-46 expression, result in skipping of L2-stage symmetric seam cell divisions. The severity of this precocious seam cell phenotype is different in three different mutants and *lin-28(lf)* displays a stronger phenotype than all three 5'UTR mutants (Figure 2A). The variability in the number of seam cells is due to variation in cell-fate decisions across the seam cells of each larva; namely, in *lin-28(lf)* animals almost all seam cells skip L2 cell-fates whereas in the 5'UTR mutants of *lin-46* not all but only some (and a varying number of) seam cells skip L2 stage cell-fates, resulting in number of seam cells varying between ten (all the seam cells skipped L2 fates) and sixteen (none of the seam cells skipped L2 fates). This variation in the number of seam cells that skip L2 fates in *lin-46* 5'UTR mutants could reflect variability in the timing or level of LIN-46 expression across seam cells.

Similar to *lin-28(lf)* mutants, in *lin-46* 5'UTR mutants seam, cells precociously express adult fates during larval stages, demonstrated by the precocious expression of a GFP transgene driven by an adult onset collagen promoter, *Pcol-19::gfp*, (Figure 2B) and by the expression of an adult cuticle structure called alae in L4 stage larvae (Figure 2C).

Lastly, we quantified the percent animals that display protruding vulva (Pvl) phenotypes in young adults (a characteristic of *lin-28(lf)* animals): all three *lin-46* 5'UTR mutants displayed Pvl phenotypes similar to *lin-28(lf)* animals (Figure 2D).

### LIN-46 is expressed in the vulval precursor cells (VPCs) and precocious LIN-46 expression leads to precocious onset of vulva development

During *C. elegans* larval development, stem cells of the ventral hypodermal lineages P3-P8 divide during the L1 stage and give rise to the six P3.p-P8.p vulval precursor cells (VPCs) [1]. After their birth in the L1 stage, the VPCs temporarily arrest in the G1 stage of the cell cycle [40] until the L3 stage when they undergo a single round of cell division. Concomitant with this cell division, three of the six VPCs (P5.p, P6.p, and P7.p) become induced to undergo additional rounds of cell divisions, giving rise to twenty-two cells that progressively differentiate and form the adult vulva. The timing of the first VPC divisions in the mid-L3 stage is controlled by genes in the heterochronic pathway, including *lin-28* [2,40]. In *lin-28(lf)* mutants, the first VPC divisions precociously take place in the L2 stage; the VPC progeny subsequently continue to precociously divide and differentiate, resulting in precocious vulva development, evidenced by an abnormally formed, protruding vulva (hence the Pvl phenotype) in *lin-28(lf)* L4 animals. Loss of *lin-46* suppresses the Pvl phenotype caused by *lin-28(lf)*. However, because LIN-46 expression in the VPCs had not been previously detected using transgenic reporters [9], it was not clear how loss of *lin-46* could affect the Pvl phenotype of *lin-28(lf)* animals.

We found that endogenously tagged LIN-46 is expressed in the VPCs at the L3 and L4 stages (Figure 3A), which coincides with the period when the VPCs develop into adult vulva. In *lin-28(lf)* mutants, LIN-46 is precociously expressed in the L2-stage VPCs, which coincides with precocious development of these VPCs in *lin-28(lf)* animals (Figure 3B, left). Moreover, in *lin-46* 5'UTR mutants, LIN-46 is precociously expressed in the VPCs at the L2 stage and VPCs develop precociously (Figure 3B, right), which indicates that precocious LIN-46 expression is sufficient to alter the timing of vulva development.

These results show that precocious LIN-46 expression is likely responsible for precocious vulva development in *lin-28(lf)* animals.

Altogether, our results show that the LIN-28 target LIN-46 suppresses L2 cell-fates and promotes transition to L3 cell-fates in both seam cells and vulval precursor cells, and precocious LIN-46 expression causes precocious cell-fate transitions, which is likely responsible for the major phenotypes observed in *lin-28(lf)* animals.

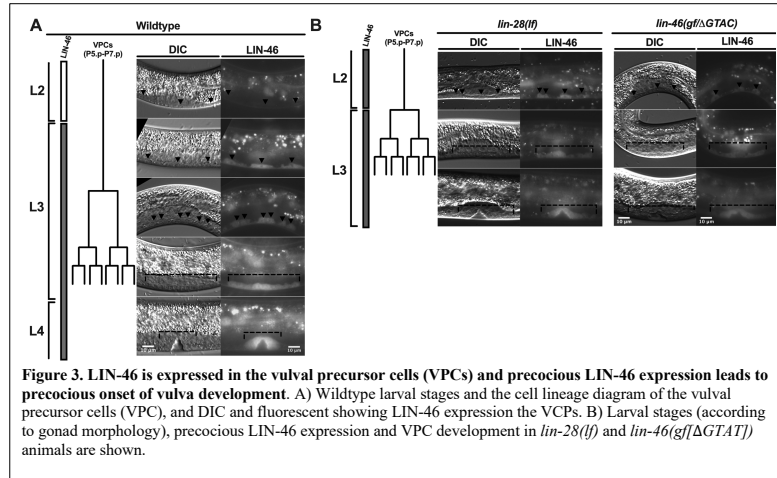

#### The architecture and conservation of the *lin-46* 5'UTR

Most *C. elegans* transcripts are trans-spliced [41], which results in the fusion of a 22-nt splice-leader (SL) RNA to the 5-prime end of the transcripts. The presence of an upstream splice acceptor "TTTCAG" (Figure S1B and 4) and expressed sequence tag (EST) clones that contain the SL1-*lin-46*-5'UTR fusion sequence, such as GenBank: FN875625.1., indicate that *lin-46* mRNA is trans-spliced. We used the RNAfold Webserver [42] to predict the structure of the 5-prime end of the *lin-46* mRNA upstream of the first (AUG) codon, which contains a fusion of the SL1 RNA to the *lin-46* 5'UTR (Figure S2A).

The predicted structure of the SL1-*lin-46*-5'UTR chimeric RNA shows base-pairing between SL1 and the first eight nucleotides at the 5-prime end of the *lin-46* 5'UTR (Figure 4A, "SL1-complementary").

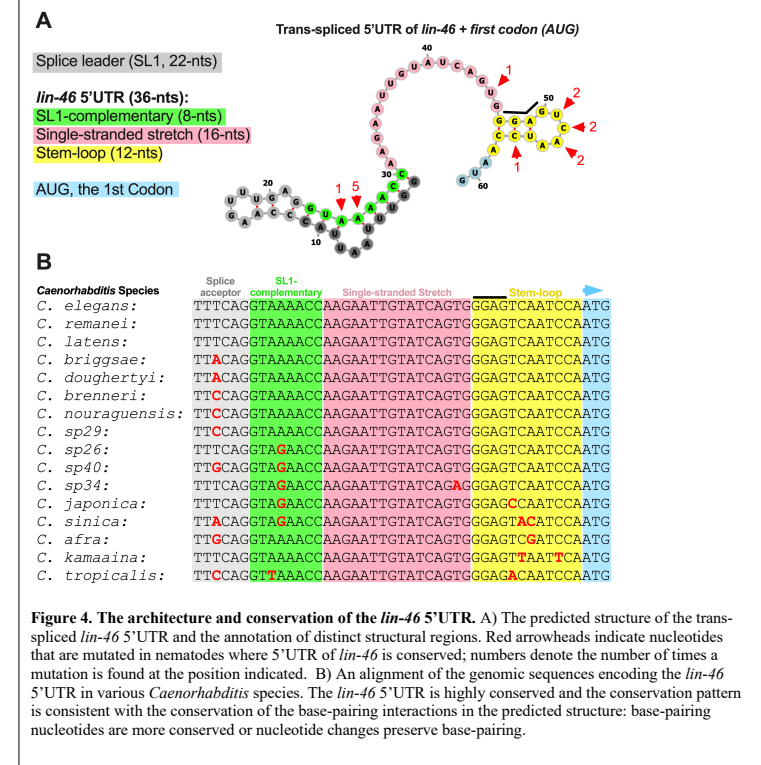

These eight nucleotides are highly conserved across nematodes; and a nucleotide variation at position 4 that is found in five different species preserve the predicted base-pairing (A-U to G-U) with the SL1 RNA, which supports the biological relevance of the predicted structure. Perturbing this base-pairing in addition to mutating more upstream sequences in the 5'UTR resulted in a weaker phenotype (*ma461* vs *ma472* in Figure 2A&D and S2), which suggests that these first eight nucleotides or their base-pairing with the SL1 sequences has a positive impact on LIN-46 expression.

Sixteen nucleotides that follow the SL1-complementary region constitute a "single-stranded stretch" region (Figure 4A) and all sixteen nucleotides are 100% conserved among all nematode species analyzed here, with the exception of *C. sp34* that has a single nucleotide change in this region (Figure 4B). This single-stranded stretch was the region primarily targeted by our CRISPR guide, *gr\_5U* (Figure S1B).



Mutations of various sizes (Figure S1D) in this region alone displayed precocious LIN-46 expression (Figure 1A-C, *ma459*) and strong *lin-28*-like phenotypes (Figure 2A, *ma461*). Interestingly, in certain *lin-46* 5'UTR mutants, such as the *ma459*, that result in strong precocious phenotypes, the predicted RNA structure is entirely altered (Figure S2B), which may indicate a causative relationship between loss of all structural elements in the *lin-46* 5'UTR and strong LIN-46 expression.

The last twelve nucleotides in the *lin-46* 5'UTR contains a GGAG sequence that is located in the stem of a predicted stem-loop structure (Figure 4A, stem-loop). The sequence conservation pattern in this region supports the biological relevance and significance of the predicted structure: 1) a C to T nucleotide change in the stem preserves base-pairing (G-C to G-U), and 2) mutations in the nucleotides in the loop region, which are not contributing to the hairpin stability, seem to be more tolerated (Figure 4B). The GGAG motif is found to be enriched in LIN-28 bound RNA regions [12], however, here the GGAG sequence or the stem-loop in the *lin-46* 5'UTR alone is not sufficient to confer repression of LIN-46 expression (see *ma472* in Figure 2A and Figure S2). Moreover, perturbing the GGAG sequence in addition to the single-stranded stretch sequences did not enhance but weakened the precocious phenotypes (*ma467* vs *ma467* in Figure 2A&D and S3), which suggests that this GGAG-containing loop, rather than an having an inhibitory role, can positively affect LIN-46 expression.

## DISCUSSION

Our results provide insights into how the conserved RNA-binding protein LIN-28 regulates its critical mRNA target, *lin-46*, in *C. elegans*, and demonstrate that *lin-46* mis-regulation is likely responsible for the phenotypes observed in *lin-28*-null animals. Our results suggest that LIN-28 controls temporal cell-fate progression by regulating LIN-46 expression via the 5'UTR of *lin-46* mRNA.

The temporally mutually exclusive expression pattern between LIN-28 and LIN-46 (revealed by the endogenously tagged alleles of *lin-28* and *lin-46*) and the effect of loss-of-function of *lin-28* on the LIN-46 expression led us to conclude that *lin-28* represses LIN-46 expression at early stages (Figure 5). Our results also suggest that the 5'UTR of *lin-46* prevents LIN-46 expression, which is likely via mediating LIN-28 binding to and repression of the *lin-46* mRNA. We showed that LIN-46 is precociously expressed in *lin-28(lf)* animals; and with the help of the *lin-46* 5'UTR mutants, which uncouple precocious LIN-46 expression from the loss-of-function of *lin-28*, we showed that precocious LIN-46 expression alone is sufficient to suppress L2 cell-fates and to promote precocious transitions to L3 cell-fates. Lastly, endogenously tagged LIN-46 is expressed in the vulva precursor cells (VPCs), which had not been reported before, and *lin-28* and *lin-46* 5'UTR are required to repress LIN-46 expression also in the VPCs. Precocious onset of LIN-46 expression in the VPCs is sufficient to stimulate the precocious onset of vulva development. These results demonstrate that precocious LIN-46 expression in seam cells and VPCs in *lin-28(lf)* mutants is responsible for the two major heterochronic phenotypes observed in the *lin-28(lf)* animals; skipping of L2 stage seam cell proliferation and precocious onset of vulva development.

We hypothesize that *lin-46* 5'UTR contains a LIN-28-binding element that is required for LIN-28-mediated repression of LIN-46 expression from the *lin-46* mRNA. The evidence that supports this hypothesis include: 1) The phenotypic similarities between *lin-28(lf)* and the 5'UTR mutants of *lin-46* reported here; 2) LIN-28 binding to the *lin-46* mRNA (including the *lin-46* 5'UTR) reported previously [12]; 3) The existence of a putative LIN-28 interacting sequence, the "GGAG", in the 5'UTR of *lin-46* (Figure 4). However, because previously LIN-28 was shown to interact with the *lin-46* mRNA at multiple sites across the entire *lin-46* mRNA in addition to the 5'UTR [12], it is surprising that mutations of the *lin-46* 5'UTR are sufficient to cause a phenotype that is consistent with an almost total loss of LIN-28-mediated regulation of the *lin-46* mRNA. Nonetheless, at least two models could reconcile a potential total loss of LIN-28-mediated repression of LIN-46 expression by mutating the 5'UTR of *lin-46* alone while leaving other LIN-28 binding sites on the *lin-46* mRNA intact. The first model is that the binding of LIN-28 to the *lin-46* 5'UTR would be required for inhibiting LIN-46 expression whereas LIN-28 binding to other sites on the *lin-46* mRNA would not inhibit LIN-46 expression. It is known that translation initiation is highly regulated [43]; and the 5'UTRs harbor sequence elements, such as upstream open reading frames (uORFs),

or structural elements, such as highly structured RNA (including G-quadruplexes and pseudoknots) or specific RNA structures that serve as binding sites for RNA-binding proteins [44], which can interfere with or inhibit the translation initiation [45,46]. In the second model, among all the LIN-28 binding sites on the *lin-46* mRNA, the *lin-46* 5'UTR (and particularly the single-stranded stretch region) might have the highest affinity for LIN-28 and might be required to initiate a sequential binding of multiple LIN-28 proteins to the *lin-46* mRNA, leading to the formation of a repressive LIN-28-*lin-46*-mRNA mRNP (messenger ribonucleoprotein) complex. In support of this model, in *in vitro* assays, LIN28 is shown to preferentially bind to single stranded RNA and more than one LIN28 proteins are shown to bind to long (longer than 30-nts) RNA in a sequential manner after the first LIN28 binds to a predicted single-stranded loop [20].

Precocious cell-fate transition phenotypes observed in *lin-46* 5'UTR mutants are not as strong as the phenotypes observed in *lin-28(lf)* mutants. Moreover, the severity of the *lin-28(lf)*-like phenotypes vary among different *lin-46* 5'UTR alleles. The severity of these phenotypes does not correlate with the size of the *lin-46* 5'UTR deletions; and in some cases, larger deletions result in not stronger but more moderate phenotypes (Figure 2). These findings are consistent with a model where the *lin-46* 5'UTR harbors multiple cis-regulatory elements that can either positively or negatively affect LIN-46 expression. Accordingly, mutants that inactivate a negative regulatory element (the presumed LIN-28 binding site) without disturbing a positive regulatory element result in higher LIN-46 expression and hence stronger precocious phenotypes.

A putative positive regulatory element in *lin-46* 5'UTR could be the first eight nucleotides of the 5'UTR that is predicted to base-pair with the SL1 sequence (SL1-complementary, Figure 4). The *lin-46* mRNA is trans-spliced, which results in the fusion of the SL1 sequence to the 5-prime end of the transcript (Figure S2A and 4). A small stem-loop structure in the SL1 sequence (Figure S2A) has been shown to enhance translation in nematodes [47]. In the predicted folding of the SL1-*lin-46*-5'UTR chimeric RNA (Figure 4), the nucleotides that form the stem-loop in the SL1 alone base-pair with the first eight nucleotides of the *lin-46* 5'UTR (Figure S2A). This SL1-5'UTR base-pairing is lost in the *lin-46(ma472)* (Figure S2B) and the phenotype of this larger deletion is weaker than the two other, smaller deletions (Figure 2A), which is consistent with the idea that base-pairing of SL1 to the *lin-46* 5'UTR has a positive impact on the translatability of the *lin-46* mRNA.

In addition to preventing precocious LIN-46 expression at the L1/L2 stage, LIN-28-mediated regulation of *lin-46* mRNA translation might play a role in controlling the level of LIN-46 accumulation at the early L3 stage, when LIN-46 has been shown to compensate for environmentally-induced reduction in *let-7*-family levels [6]. The *C. elegans lin-28-lin-46* pathway acts in parallel to *let-7* family microRNAs [7,8] and regulate the nuclear localization, hence the activity, of a critical *let-7*-family target and a transcription factor, Hunchback-like-1 (HBL-1) [manuscript-oi2]. Remarkably, precocious LIN-46 expression conferred by the *lin-46* 5'UTR mutants can fully compensate for the loss of all *let-7*-complementary sites in the *hbl-1* 3'UTR [manuscript-oi2], which otherwise causes a severe extra seam cell phenotype due to ectopic HBL-1 activity at L3/L4 stages [manuscript-oi2]. Additionally, *lin-46* activity becomes more important in preventing L3-/L4-stage HBL-1 activity at low temperatures [9], or when animals develop through a temporary diapause [48], or merely when animals experience an extended L2 (L2d) in the presence of diapause-inducing pheromones or starvation stress [6]. L2d/Dauer-inducing conditions also result in the repression of *let-7*-family microRNAs mediated by the nuclear hormone receptor DAF-12 [49,50]. Our recent findings suggest that this repression of *let-7*-family microRNAs is coupled to a DAF-12-mediated activation of an alternative *lin-46*-mediated program for HBL-1 down-regulation in seam cells [6]. One way to compensate for reduced *let-7*-family levels by LIN-46 activity would simply be the induction of LIN-46 expression in response to environmental conditions that repress *let-7*-family microRNAs. Such an induction mechanism that regulates LIN-46 levels at the L3 stage to match the level of *let-7*-family repression at the L2 stage may utilize LIN-28/5'UTR-mediated regulation of LIN-46 expression as a gate to uncouple *lin-46* mRNA accumulation from LIN-46 accumulation, which can provide a control over the rate of LIN-46 accumulation at the early L3 stage (Figure 5B). In this hypothetical model, during a lengthened L2d, *lin-46* mRNA may accumulate in proportion to the length of the L2d stage (which is thought to correlate with the severity of the environmental conditions as well as the degree of *let-7*-family repression). At the L2/L2d stage *lin-46* mRNA cannot be translated due to LIN-28-

mediated inhibition; however, at the L3 stage, when LIN-28 expression is diminished, the L2/L2d-accumulated pool of *lin-46* mRNA would be translated. Thus, LIN-46, expressed from a *lin-46* mRNA pool whose size negatively correlates with the reduction in *let-7*-family levels, can accumulate fast enough to sufficiently inhibit residual or ectopic HBL-1 activity at the post-L2d L3 stage, perfectly compensating for the failure to inhibit the synthesis of HBL-1 at the L2d stage due to repressed *let-7* family microRNAs.

In summary, we provide evidence indicating that LIN-28 represses the expression of its critical mRNA target in *C. elegans*, an intact *lin-46* 5'UTR is required LIN-28-mediated repression of *lin-46* expression, and precocious LIN-46 expression alone is likely responsible for the majority of *lin-28(lf)* phenotypes. Our findings highlight the biological importance of the mRNA targets of LIN-28 (*C. elegans* LIN-28 and its orthologs), which may have important functions in regulating pluripotency, reprogramming, or oncogenesis in humans and various other organisms.

3'UTR- and microRNA-mediated mechanisms and their roles in controlling temporal dynamics of gene expression have extensively been studied in the context of the *C. elegans* heterochronic pathway. However, the involvement of 5'UTRs in the heterochronic pathway was not known and the identities and roles of cis-regulatory elements in the *C. elegans* 5'UTRs are largely unknown. Here, we identified a critical role for the *lin-46* 5'UTR in preventing precocious cell-fate transitions in seam and vulval precursor cell lineages. Conservation in the 5'UTRs is not widespread, but interestingly, the 5'UTRs of many heterochronic and developmental genes in *C. elegans* appear to be evolutionary conserved, which may provide a platform to further explore the functions of mRNA cis-regulatory elements and the roles of trans-acting RNA binding proteins in regulating stage specific gene expression and developmental progression.

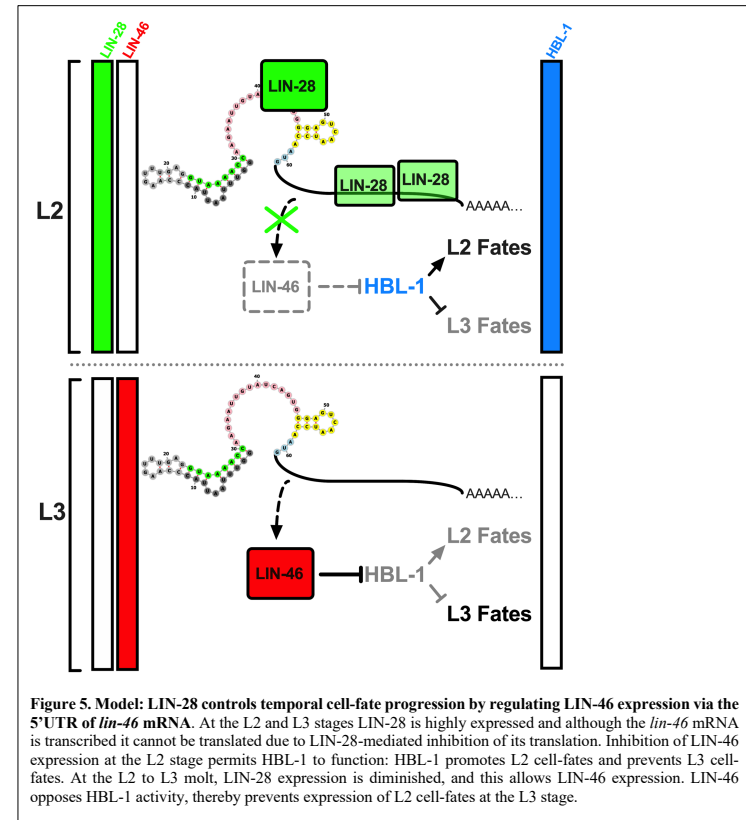

## MATERIALS AND METHODS

### *C. elegans* culture conditions

*C. elegans* strains used in this study and corresponding figures in the paper are listed in Table S2. *C. elegans* strains were maintained at 20°C on nematode growth media (NGM) and fed with the *E. coli* HB101 strain.

### Assaying extra seam cell and Pvl phenotypes

The worms were scored at the young adult stage (determined by the gonad development) for the number of seam cells using fluorescence microscopy with the help of the *mals105 [pCol-19::gfp]* transgene that marks the lateral hypodermal cell nuclei and/or for protruding vulva phenotype (Pvl) by examining the vulva morphology (as given in Figure 2D).

Each circle on the genotype versus number of seam cells plots shows the observed number of seam cells on one side of a single young adult worm. A minimum of 20 worms for each genotype are analyzed and the average number of seam cells (denoted by lateral bars in the genotype versus number of seam cell plots); percent Pvl values are calculated and represented using a bar graph. The Student's t test is used to calculate statistical significance when comparing different genotypes. The GraphPad Prism 8 software is used to plot the graphs and for statistical analysis.

### Microscopy

All DIC and fluorescent images are obtained using a ZEISS Imager Z1 equipped with ZEISS Axiocam 503 mono camera, and the ZEN Blue software. Prior to imaging, worms were anesthetized with 0.2 mM levamisole in M9 buffer and mounted on 2% agarose pads. The ImageJ Fiji software is used to adjust the brightness and contrast of the images to enhance the visualization of the fluorescent signal. All images are taken using the same microscopy settings and a standard exposure time for all larval stages and genetic background for each reporter (*lin-28::gfp* and *lin-46::mCherry*). To enhance the visualization of the fluorescent signals in the figures and to allow comparison of signal intensities in larvae of different genetic backgrounds, fluorescent images of larvae from different backgrounds are stitched together using the ImageJ software and the brightness and contrast of these montaged images were adjusted (in Figure 1B and 3).

### Tagging of *lin-28* and *lin-46* using CRISPR/Cas9

A mixture of plasmids encoding SpCas9 (pOI90, 70 ng/μL), and single guide RNAs (sgRNAs) targeting the site of interest (60 ng/μL of pSW65 for *lin-28* or pOI113 for *lin-46*) and the *unc-22* gene (pOI91, 30 ng/μL) as co-CRISPR marker, a donor plasmid (20 ng/μL of pOI173 for *lin-28* or pOI167 for *lin-46*) containing the *gfp* or *mCherry* sequence flanked by gene-specific homology arms, and a *rol-6(su1006)* containing plasmid (pOI124, 30 ng/μL) as co-injection marker was injected into the germlines of ten young adult worms. F1 roller and/or twitcher animals (100-200 worms) were cloned and screened by PCR amplification (Table S3) for the presence of the expected homologous recombination (HR) product. F2 progeny of F1 clones positive for the

HR-specific PCR amplification product were screened for homozygous HR edits by PCR amplification of the locus using primers that flanked the HR arms used in the donor plasmid (Table S3). Finally, the genomic locus spanning the HR arms and *gfp* or *mCherry* DNA was sequenced using Sanger sequencing. A single worm with a precise HR edited *lin-28* or *lin-46* locus was cloned and backcrossed twice before used in the experiments.

### CRISPR/Cas9-mutagenesis of the *lin-46* 5'UTR

A mixture of plasmids encoding SpCas9 (pOI90, 70 ng/μL), and gR\_5U single guide RNA (sgRNAs) targeting the *lin-46* 5'UTR (Figure S1; pOI193 60 ng/μL) was injected into the germlines of young adult worms expressing the adult onset *gfp* transgene (Table S2; VT1357). F1 or F2 animals displaying precocious cell-fate phenotypes, which were consisted of precocious *Pcol-19::gfp* expression in the seam cells (Figure S2C) and protruding vulva morphology (Figure 2D), were cloned and genotyped for in-del events at the gR\_5U targeting site (Figure S2D).

## Supplemental information:

**Table S1. Comparison of LIN-46 expression observed in transgene reporters versus endogenously tagged locus**

| Tissue or Cell Type    | Pepper <i>et al.</i> (2004) Development.<br>Transcriptional and translational reporters. | This study.<br>Endogenously tagged <i>lin-46</i> |
|------------------------|------------------------------------------------------------------------------------------|--------------------------------------------------|
| Seam Cells             | At all larval stages.                                                                    | Only at the L3 and L4 stages.                    |
| Vulval Precursor Cells | N/A                                                                                      | Yes. At the L3 and L4 stages.                    |

|                                                                         |     |                                                                                                                                                                                                                                                  |
|-------------------------------------------------------------------------|-----|--------------------------------------------------------------------------------------------------------------------------------------------------------------------------------------------------------------------------------------------------|
| AVB Neurons                                                             | Yes | <p>Expression observed in a few cells in the head but cell identities (e.g. AVB) have not been determined using known cell-specific reporters. An example:</p> 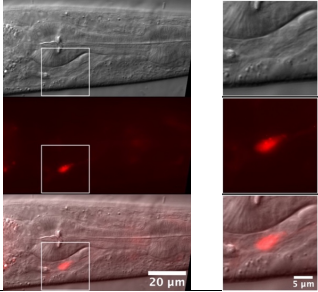 |
| Hypodermal cells in the tail (Possibly: hpy10, U, Y, F, B, and K cells) | N/A | <p>Yes. At the L3 and L4 stages.</p>                                                                                                                            |

**Table S2. *C. elegans* strains used in this study.**

| Strain name | Genotype                                                                        | Related figures      |
|-------------|---------------------------------------------------------------------------------|----------------------|
| VT3737      | <i>lin-28(ma426[lin-28::gfp] I; lin-46(ma398[lin-46::mCherry] V</i>             | Figure 1A-C, 3A      |
| VT3652      | <i>lin-28(n719) I; lin-46(ma398[lin-46::mCherry] V</i>                          | Figure 1A-C, 3B      |
| VT3847      | <i>lin-28(ma426[lin-28::gfp] I; lin-46(ma398ma459[ΔGTAT::lin-46::mCherry] V</i> | Figure 1A-C, 3B      |
| VT1367      | <i>maIs105 (Pcol-19::gfp) V</i>                                                 | Figure 2A, B, D, S1C |
| VT790       | <i>lin-28(n719) I; maIs105 V</i>                                                | Figure 2A, D         |
| VT3849      | <i>lin-46(ma461) maIs105 V</i>                                                  | Figure 2A-D          |
| VT3855      | <i>lin-46(ma467) maIs105 V</i>                                                  | Figure 2A, D         |
| VT3860      | <i>lin-46(ma472) maIs105 V</i>                                                  | Figure 2A, D         |

**Table S3. PCR Primers used in this study.**

| Cloning/PCR primers                                                                                    | Primer name           | Primer Sequence                                             | Plasmid name and/or purpose                                                                                                                                                                                                                                                                                                                                                                         |
|--------------------------------------------------------------------------------------------------------|-----------------------|-------------------------------------------------------------|-----------------------------------------------------------------------------------------------------------------------------------------------------------------------------------------------------------------------------------------------------------------------------------------------------------------------------------------------------------------------------------------------------|
| Cloning: Annealed primer-pairs that are cloned into pOI83 to express sgRNAs                            | priSW224              | tctttagatgattctatctcatcag                                   | pSW65, sgRNA expressing plasmid is used to tag <i>lin-28</i> with <i>gfp</i>                                                                                                                                                                                                                                                                                                                        |
|                                                                                                        | priSW225              | aaacctgatgaatagaatcatctac                                   |                                                                                                                                                                                                                                                                                                                                                                                                     |
|                                                                                                        | priOI362              | tcttgctagatcaaccaagtctc                                     | pOI113, sgRNA expressing plasmid is used to tag <i>lin-46</i> with mCherry                                                                                                                                                                                                                                                                                                                          |
|                                                                                                        | priOI363              | aaacgagacgtggttgatctacgc                                    |                                                                                                                                                                                                                                                                                                                                                                                                     |
|                                                                                                        | priOI724              | tcttgaaccaagaattgtatcag                                     | pOI193, sgRNA gR_5U expressing plasmid is used to mutagenize the <i>lin-46</i> 5'UTR (Figure S1)                                                                                                                                                                                                                                                                                                    |
| Cloning: Primers that are used to clone the HR template to tag <i>lin-28</i> with <i>gfp</i> (pOI173)  | priOI725              | aaacctgatacaattcttggttc                                     |                                                                                                                                                                                                                                                                                                                                                                                                     |
|                                                                                                        | priOI551              | agaaccccaaacggacggaattctcccc<br>gggctagcgtgcgagcggatcgagcag | Primer pair used to amplify the blasmid backbone. Primers contain tails to allow Gibson Assembly with 5' and 3' HR arms.                                                                                                                                                                                                                                                                            |
|                                                                                                        | priOI552              | accataagcaaaagtctctcgcagga<br>ccaagcttggtgacgagagcagcgc     |                                                                                                                                                                                                                                                                                                                                                                                                     |
|                                                                                                        | priOI553              | tgcgagagaaactttgcttatggt                                    | Primer pair used to amplify the 5' HR arm using N2 (wildtype <i>C. elegans</i> ) DNA as template.                                                                                                                                                                                                                                                                                                   |
|                                                                                                        | priOI554              | ttcatcagagaaattactattcttt                                   |                                                                                                                                                                                                                                                                                                                                                                                                     |
| Cloning: Primers that are used to clone the HR Template to tag and <i>lin-46</i> with mCherry (pOI167) | priOI555              | aagaatagtaattctctgatgaaAgta<br>aaggagaagaactttcactg         | Primer pair used to amplify <i>gfp</i> sequence (similar to but modified version of the <i>gfp</i> sequence found in pCM1.53; modification is insertion of a loxP site into the last intron of <i>gfp</i> ).                                                                                                                                                                                        |
|                                                                                                        | priOI556              | ctctatacaattctcagtgctagatg<br>attctattgtatagttcgtccatgccatg |                                                                                                                                                                                                                                                                                                                                                                                                     |
|                                                                                                        | priOI557              | tctagacactgagaatttgatagagaa<br>ataatgcaatatatggtctcaaatag   | Primer pair used to amplify the 3' HR arm using N2 (wildtype <i>C. elegans</i> ) DNA as template.                                                                                                                                                                                                                                                                                                   |
|                                                                                                        | priOI558              | gacaattccgtccgtttgggttct                                    |                                                                                                                                                                                                                                                                                                                                                                                                     |
|                                                                                                        | priOI574F             | ggtggtggtggtggtggtctcaaaagggtgaagaat<br>aacatgg             | Primer pair used to amplify mCherry sequence and to add a 6xGly linker.                                                                                                                                                                                                                                                                                                                             |
| Cloning: primers used in cloning of pOI120 and define the ends of the HR arms in pOI120 and pOI167     | priOI575R             | cttatacaattcatccatgccacc                                    |                                                                                                                                                                                                                                                                                                                                                                                                     |
|                                                                                                        | priOI576F             | ggtgcatggaattgtataagtgaattcaccagat<br>caattttcc             | Primer pair used to amplify 5' and 3' HR arms and a plasmid backbone from a plasmid (pOI120) that contained HR template containing <i>gfp</i> instead of mCherry                                                                                                                                                                                                                                    |
|                                                                                                        | priOI577R             | ctttgagacaccaccaccacctgcaaaagctagatc<br>aaccagctctcc        |                                                                                                                                                                                                                                                                                                                                                                                                     |
| PCR Primers used for screening and validating HR events.                                               | priOI353F             | gccggtccgggaagtactgaaacgttga                                | Used to amplify the 5' and 3' HR arm in cloning of the pOI120 plasmid; define the ends of the HR arms in pOI120 and pOI167. Primers contain restriction enzyme cut sites (underlined).                                                                                                                                                                                                              |
|                                                                                                        | priOI354R             | <u>gccaaagctt</u> gaaaaacccatgttttgaaga                     |                                                                                                                                                                                                                                                                                                                                                                                                     |
|                                                                                                        | priOI559F             | cgaatggaaaaggtagagaagc                                      | priOI559 and priOI560 flank the homologous recombination (HR) arms in the HR template plasmid (pOI173). Primer pairs priOI559-pri373R and pri372F-priOI560R were used to screen F1 progeny for <i>lin-28::gfp</i> integration events, and priOI559-priOI560R pair is used to detect <i>lin-28::gfp</i> alleles in F2 progeny and to validate the precise edit of the locus using sanger sequencing. |
|                                                                                                        | priOI373R (GFP_R)     | ccatctaattcaacaagaattgggacaa<br>c                           |                                                                                                                                                                                                                                                                                                                                                                                                     |
|                                                                                                        | priOI372F (GFP_F)     | ggctctctttagtttgaac                                         |                                                                                                                                                                                                                                                                                                                                                                                                     |
| PCR Primers used for screening and validating HR events.                                               | priOI560R             | agcggagaatcagaagcgttg                                       |                                                                                                                                                                                                                                                                                                                                                                                                     |
|                                                                                                        | priOI223F             | acgaacggctgcaagtttg                                         | priOI223 and priOI226 flank the homologous recombination (HR) arms in the HR template plasmid (pOI167). Primer pairs priOI223F-pri588R and priOI586F-pri226R were used to screen F1 progeny                                                                                                                                                                                                         |
|                                                                                                        | priOI588R (mCherry_R) | tgcggtttgtgttccctcat                                        |                                                                                                                                                                                                                                                                                                                                                                                                     |



|                           |                       |                                                                                                                                                                                                                   |
|---------------------------|-----------------------|-------------------------------------------------------------------------------------------------------------------------------------------------------------------------------------------------------------------|
| priOIS86F<br>(mCherry_ F) | atgaggggaacacaaaccgca | for <i>lin-46::mCherry</i> integration events, and priO1223F-priO1226R pair is used to detect <i>lin-46::mCherry</i> alleles in F2 progeny and to validate the precise edit of the locus using sanger sequencing. |
| priO1226R                 | actcctcagttgtctctggc  |                                                                                                                                                                                                                   |

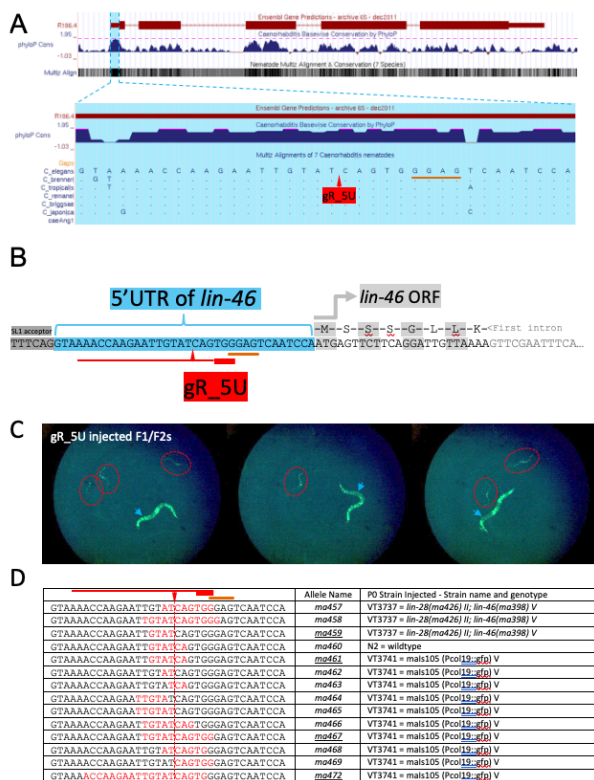

**Figure S1. CRISPR/Cas9 mutagenesis of the conserved 5'UTR of *lin-46*.** A) Genome browser view of the *C. elegans lin-46* gene (top) and the magnified 5'UTR sequence (bottom). Genome browser tracks: Ensembl Gene Predictions (top), PhyloP conservation (middle), Nematode Multiz

Alignment (bottom). Note that the phyloP and Multiz tracks show the high conservation in the 5'UTR among the seven nematode species listed in the figure. The gR\_5U guide cut-site and the GGAG in the 5'UTR of *lin-46* are marked. B) *lin-46* 5'UTR flanked by the TTCAG splice acceptor and the *lin-46* ORF as well as the gR\_5U and the GGAG are shown. C) Examples of F1/F2 animals among the progeny of gR\_5U injected P0s that express precocious *Pcol-19::gfp* are marked with blue arrowheads. F1/F2 progeny displaying wildtype *Pcol-19::gfp* pattern are marked with blue arrowheads. D) Various mutations in the 5'UTR of *lin-46* that are detected in the F1/F2 progeny of the gR\_5U injected animals displaying precocious *Pcol-19::gfp* or protruding vulva phenotypes listed in the left column. Red fonts indicate the deleted nucleotides in each allele, and three different regions of the *lin-46* 5'UTR as shown in Figure 4, are highlighted with three different colors. Allele names given to these mutations and the P0s strains injected are given in the middle and right columns, respectively.

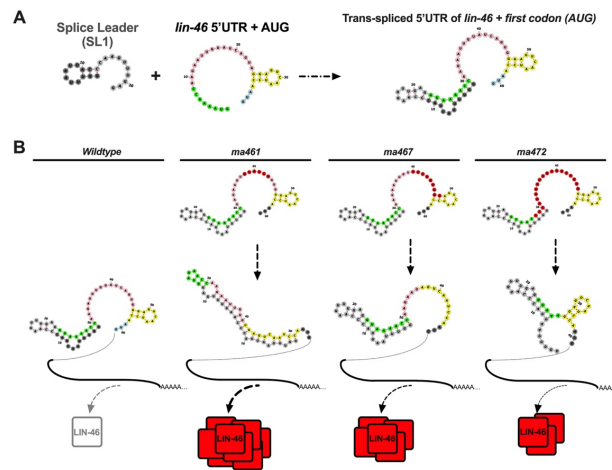

**Figure S2. The effects of 5'UTR mutations on the folding of trans-spliced 5'UTR of *lin-46*.** A) Predicted folding of the splice leader (SL1) and *lin-46* 5'UTR before and after trans-splicing. B) Predicted changes in the folding of the trans-spliced *lin-46* 5'UTR in three different mutants and schematic representation of LIN-46 expression inferred from the phenotypes (e.g. Figure 2A) observed in animals carrying each mutation.

## REFERENCES

1. Sulston, J.E., and Horvitz, H.R. (1977). Post-embryonic cell lineages of the nematode, *Caenorhabditis elegans*. *Dev. Biol.* *56*, 110–156.
2. Ambros, V., and Horvitz, H.R. (1984). Heterochronic mutants of the nematode *Caenorhabditis elegans*. *Science* *226*, 409–416.
3. Ambros, V. (2011). MicroRNAs and developmental timing. *Curr. Opin. Genet. Dev.* *21*, 511–517.
4. Abrahante, J.E., Daul, A.L., Li, M., Volk, M.L., Tennessen, J.M., Miller, E.A., and Rougvie, A.E. (2003). The *Caenorhabditis elegans* hunchback-like gene *lin-57/hbl-1* controls developmental time and is regulated by microRNAs. *Dev. Cell* *4*, 625–37.
5. Lin, S.Y., Johnson, S.M., Abraham, M., Vella, M.C., Pasquinelli, A., Gamberi, C., Gottlieb, E., and Slack, F.J. (2003). The *C. elegans* hunchback homolog, *hbl-1*, controls temporal patterning and is a probable MicroRNA target. *Dev. Cell* *4*, 639–650.
6. Ilbay, O., and Ambros, V. (2019). Pheromones and Nutritional Signals Regulate the Developmental Reliance on let-7 Family MicroRNAs in *C. elegans*. *Curr. Biol.* *29*, 1735–1745.e4.
7. Abbott, A.L., Alvarez-Saavedra, E., Miska, E.A., Lau, N.C., Bartel, D.P., Horvitz, H.R., and Ambros, V. (2005). The let-7 MicroRNA family members *mir-48*, *mir-84*, and *mir-241* function together to regulate developmental timing in *Caenorhabditis elegans*. *Dev. Cell* *9*, 403–414.
8. Vadla, B., Kemper, K., Alaimo, J., Heine, C., and Moss, E.G. (2012). Lin-28 controls the succession of cell fate choices via two distinct activities. *PLoS Genet.* *8*.
9. Pepper, A.S.-R., McCane, J.E., Kemper, K., Yeung, D.A., Lee, R.C., Ambros, V., and Moss, E.G. (2004). The *C. elegans* heterochronic gene *lin-46* affects developmental timing at two larval stages and encodes a relative of the scaffolding protein gephyrin. *Development* *131*, 2049–2059.
10. Van Wynsberghe, P.M., Kai, Z.S., Massirer, K.B., Burton, V.H., Yeo, G.W., and Pasquinelli, A.E. (2011). LIN-28 co-transcriptionally binds primary let-7 to regulate miRNA maturation in *Caenorhabditis elegans*. *Nat. Struct. & Mol. Biol.* *18*, 302.
11. Reinhart, B.J., Slack, F.J., Basson, M., Pasquinelli, A.E., Bettinger, J.C., Rougvie, A.E., Horvitz, H.R., and Ruvkun, G. (2000). The 21-nucleotide let-7 RNA regulates developmental timing in *Caenorhabditis elegans*. *Nature* *403*, 901–906.
12. Stefani, G., Chen, X., Zhao, H., and Slack, F.J. (2015). A novel mechanism of LIN-28 regulation of let-7 microRNA expression revealed by in vivo HITS-CLIP in *C. elegans*. *RNA* *21*, 985–996.
13. Feng, G., Tintrup, H., Kirsch, J., Nichol, M.C., Kuhse, J., Betz, H., and Sanes, J.R. (1998). Dual Requirement for Gephyrin in Glycine Receptor Clustering and Molybdoenzyme Activity. *Science* (80- ). *282*, 1321 LP – 1324.
14. Fritschy, J.-M., Harvey, R.J., and Schwarz, G. (2008). Gephyrin: where do we stand, where do we go? *Trends Neurosci.* *31*, 257–264.
15. Viswanathan, S.R., Daley, G.Q., and Gregory, R.I. (2008). Selective Blockade of MicroRNA Processing by Lin28. *Science* (80- ). *320*, 97 LP – 100.
16. Newman, M.A., Thomson, J.M., and Hammond, S.M. (2008). Lin-28 interaction with the Let-7 precursor loop mediates regulated microRNA processing. *RNA* *14*, 1539–1549.
17. Rybak, A., Fuchs, H., Smirnova, L., Brandt, C., Pohl, E.E., Nitsch, R., and Wulczyn, F.G. (2008). A feedback loop comprising *lin-28* and *let-7* controls pre-let-7 maturation during neural stem-cell commitment. *Nat. Cell Biol.* *10*, 987.
18. Cho, J., Chang, H., Kwon, S.C., Kim, B., Kim, Y., Choe, J., Ha, M., Kim, Y.K., and Kim, V.N. (2012). LIN28A is a Suppressor of ER-Associated Translation in Embryonic Stem Cells. *Cell* *151*, 765–777.
19. Wilbert, M.L., Huelga, S.C., Kapeli, K., Stark, T.J., Liang, T.Y., Chen, S.X., Yan, B.Y., Nathanson, J.L., Hutt, K.R., Lovci, M.T., et al. (2012). LIN28 binds messenger RNAs at GGAGA motifs and regulates splicing factor abundance. *Mol. Cell* *48*, 195–206.
20. Hafner, M., Max, K.E.A., Bandaru, P., Morozov, P., Gerstberger, S., Brown, M., Molina, H., and Tuschl, T. (2013). Identification of mRNAs bound and regulated by human LIN28 proteins and molecular requirements for RNA recognition. *RNA* *19*, 613–626.
21. Moss, E.G., Lee, R.C., and Ambros, V. (1997). The cold shock domain protein LIN-28 controls developmental timing in *C. elegans* and is regulated by the *lin-4* RNA. *Cell* *88*, 637–646.
22. Yu, J., Vodyanik, M.A., Smuga-Otto, K., Antosiewicz-Bourget, J., Frane, J.L., Tian, S., Nie, J., Jonsdottir, G.A., Ruotti, V., Stewart, R., et al. (2007). Induced pluripotent stem cell lines derived from human somatic cells. *Science* *318*, 1917–20.
23. Yuan, J., Nguyen, C.K., Liu, X., Kanellopoulou, C., and Muljo, S.A. (2012). Lin28b Reprograms Adult Bone Marrow Hematopoietic Progenitors to Mediate Fetal-Like Lymphopoiesis. *Science* (80- ). *335*, 1195 LP – 1200.
24. Moss, E.G., and Tang, L. (2003). Conservation of the heterochronic regulator Lin-28, its developmental expression and microRNA complementary sites. *Dev. Biol.* *258*, 432–442.
25. Yang, D.-H., and Moss, E.G. (2003). Temporally regulated expression of Lin-28 in diverse tissues of the developing mouse. *Gene Expr. Patterns* *3*, 719–726.
26. Shyh-Chang, N., and Daley, G.Q. (2013). Lin28: Primal Regulator of Growth and Metabolism in Stem Cells. *Cell Stem Cell* *12*, 395–406.
27. Thornton, J.E., and Gregory, R.I. (2012). How does Lin28 let-7 control development and disease? *Trends Cell Biol.* *22*, 474–482.
28. Viswanathan, S.R., Powers, J.T., Einhorn, W., Hoshida, Y., Ng, T.L., Toffanin, S., O’Sullivan, M., Lu, J., Phillips, L.A., Lockhart, V.L., et al. (2009). Lin28 promotes transformation and is associated with advanced human malignancies. *Nat. Genet.* *41*, 843.
29. Johnson, S.M., Grosshans, H., Shingara, J., Byrom, M., Jarvis, R., Cheng, A., Labourier, E., Reinert, K.L., Brown, D., and Slack, F.J. (2005). RAS Is Regulated by the let-7 MicroRNA Family. *Cell* *120*, 635–647.
30. Lee, Y.S., and Dutta, A. (2007). The tumor suppressor microRNA let-7 represses the HMGA2 oncogene. *Genes Dev.* *21*, 1025–1030.
31. Sampson, V.B., Rong, N.H., Han, J., Yang, Q., Aris, V., Soteropoulos, P., Petrelli, N.J., Dunn, S.P., and Krueger, L.J. (2007). MicroRNA Let-7a Down-regulates MYC and Reverts MYC-Induced Growth in Burkitt Lymphoma Cells. *Cancer Res.* *67*, 9762 LP – 9770.
32. Johnson, C.D., Esquela-Kerscher, A., Stefani, G., Byrom, M., Kelnar, K., Ovcharenko, D., Wilson, M., Wang, X., Shelton, J., Shingara, J., et al. (2007). The let-7 MicroRNA Represses Cell Proliferation Pathways in Human Cells. *Cancer Res.* *67*, 7713 LP – 7722.
33. Melton, C., Judson, R.L., and Belloch, R. (2010). Opposing microRNA families regulate self-renewal in mouse embryonic stem cells. *Nature* *463*, 621.
34. Balzer, E., Heine, C., Jiang, Q., Lee, V.M., and Moss, E.G. (2010). LIN28 alters cell fate succession and acts independently of the  $\mu$  and  $\nu$  let-7 microRNA during neurogenesis in vitro. *Development* *137*, 891 LP – 900.
35. King, C.E., Wang, L., Winograd, R., Madison, B.B., Mongroo, P.S., Johnstone, C.N., and Rustgi, A.K. (2011). LIN28B fosters colon cancer migration, invasion and transformation through let-7-dependent and -independent mechanisms. *Oncogene* *30*, 4185–4193.
36. Poleskaya, A., Cuvellier, S., Naguibeva, I., Duquet, A., Moss, E.G., and Harel-Bellan, A. (2007). Lin-28 binds IGF-2 mRNA and participates in skeletal myogenesis by increasing translation efficiency. *Genes Dev.* *21*, 1125–1138.
37. Xu, B., Zhang, K., and Huang, Y. (2009). Lin28 modulates cell growth and associates with a subset of cell cycle regulator mRNAs in mouse embryonic stem cells. *RNA* *15*, 357–361.
38. Xu, B., and Huang, Y. (2009). Histone H2a mRNA interacts with Lin28 and contains a Lin28-dependent posttranscriptional regulatory element. *Nucleic Acids Res.* *37*, 4256–4263.
39. Qiu, C., Ma, Y., Wang, J., Peng, S., and Huang, Y. (2010). Lin28-mediated post-transcriptional regulation of Oct4 expression in human embryonic stem cells. *Nucleic Acids Res.* *38*, 1240–1248.
40. Euling, S., and Ambros, V. (1996). Heterochronic Genes Control Cell Cycle Progress and Developmental Competence of *C. elegans* Vulva Precursor Cells. *Cell* *84*, 667–676.
41. Blumenthal, T. (2012). Trans-splicing and operons in *C. elegans*. *WormBook*, 1–11.
42. Gruber, A.R., Lorenz, R., Bernhart, S.H., Neubock, R., and Hofacker, I.L. (2008). The Vienna RNA

- websites. *Nucleic Acids Res.* *36*, W70-4.
43. Sonenberg, N., and Hinnebusch, A.G. (2009). Regulation of Translation Initiation in Eukaryotes: Mechanisms and Biological Targets. *Cell* *136*, 731–745.
  44. Hentze, M.W., Caughman, S.W., Rouault, T.A., Barriocanal, J.G., Dancis, A., Harford, J.B., and Klausner, R.D. (1987). Identification of the iron-responsive element for the translational regulation of human ferritin mRNA. *Science* (80-. ). *238*, 1570 LP – 1573.
  45. Hinnebusch, A.G., Ivanov, I.P., and Sonenberg, N. (2016). Translational control by 5'-untranslated regions of eukaryotic mRNAs. *Science* (80-. ). *352*, 1413 LP – 1416.
  46. Leppke, K., Das, R., and Barna, M. (2018). Functional 5' UTR mRNA structures in eukaryotic translation regulation and how to find them. *Nat. Rev. Mol. Cell Biol.* *19*, 158–174.
  47. Wallace, A., Filbin, M.E., Veo, B., McFarland, C., Stepinski, J., Jankowska-Anyszka, M., Darzynkiewicz, E., and Davis, R.E. (2010). The Nematode Eukaryotic Translation Initiation Factor 4E/G Complex Works with a <em>Spliced Leader Stem-Loop To Enable Efficient Translation of Trimethylguanosine-Capped RNAs. Mol. Cell. Biol. 30, 1958 LP – 1970.
  48. Karp, X., and Ambros, V. (2012). Dauer larva quiescence alters the circuitry of microRNA pathways regulating cell fate progression in *C. elegans*. *Development* *139*, 2177–2186.
  49. Bethke, A., Fielenbach, N., Wang, Z., Mangelsdorf, D.J., and Antebi, A. (2009). Nuclear hormone receptor regulation of microRNAs controls developmental progression. *Science* *324*, 95–8.
  50. Hammell, C.M., Karp, X., and Ambros, V. (2009). A feedback circuit involving let-7-family miRNAs and DAF-12 integrates environmental signals and developmental timing in *Caenorhabditis elegans*. *Proc. Natl. Acad. Sci. U. S. A.* *106*, 18668–73.
  51. Choi, S., and Ambros, V. (2019). The <em>lin-28</em> coordinates the timing of hypodermal and somatic gonadal programs for hermaphrodite reproductive system morphogenesis. *Development*, dev.164293.
